# Supplementary material for: Tissue-Specific Accumulation of Sulfur Compounds and Saponins in Different Parts of Garlic Cloves from Purple and White Ecotypes
Source: PubMed Central journal article supplement (PMC6152257; doi:10.3390/molecules22081359), 2017-08-20
Supplement: molecules-22-01359-s001.pdf [file molecules-22-01359-s001.pdf]

## Supplementary Materials

# Tissue-Specific Accumulation of Sulfur Compounds and Saponins in Different Parts of Garlic Cloves from Purple and White Ecotypes

Gianfranco Diretto <sup>1</sup>, Angela Rubio-Moraga <sup>2</sup>, Javier Argandoña <sup>2</sup>, Purificación Castillo <sup>3</sup>, Lourdes Gómez-Gómez <sup>2</sup> and Oussama Ahrazem <sup>2,4,\*</sup>

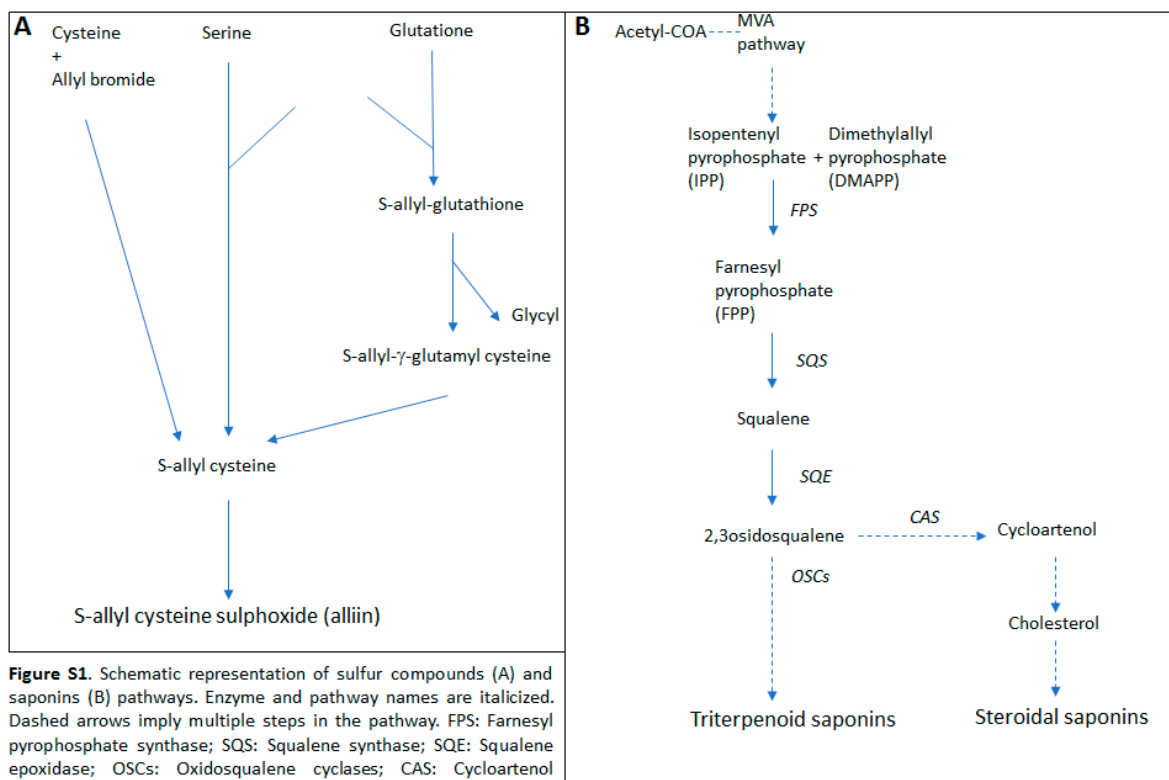

**Table S1.** LC-HRMS analyses of sulfur compounds in three tissues (SS, ES and IS) of white and purple garlic ecotypes. Data are expressed as AVG+ST.DEV. AVGs, which represent, for each metabolite, the fold over the internal standard (IS) have been obtained by using, at least, 3 independent biological replicates. Asterisks indicate significance of the fold change in an ANOVA plus Tukey's t-test (\*:  $p \leq 0.05$ ; \*\*:  $p \leq 0.01$ ; \*\*\*:  $p \leq 0.001$ ).

|                                                           | WHITE-SS         | PURPLE-SS        | WHITE-ES         | PURPLE-ES       | WHITE-IS        | PURPLE-IS       |
|-----------------------------------------------------------|------------------|------------------|------------------|-----------------|-----------------|-----------------|
| <b>2-vinyl-2,4-dihydro-1,3-dithiin</b>                    | 0.0028±0.0001    | 1.8123±0.0003*** | 0.0082±0.0015    | 0.0118±0.0007   | 0.0005±0.0001   | 0.0008±0.0001*  |
| <b>ajoene</b>                                             | 0.0756±0.0020    | 2.7861±0.0048*** | 0.1318±0.0065    | 0.1815±0.0103*  | 0.0075±0.0004   | 0.0088±0.0010   |
| <b>allicin</b>                                            | 0.5215±0.0001    | 3.3462±0.0006*** | 2.2306±0.1522    | 3.7611±0.2797** | 0.4038±0.0054   | nd              |
| <b>alliin</b>                                             | 5.9797±0.0943*** | 0.2654±0.0597    | 7.5575±0.2785**  | 5.8623±0.0399   | 0.8561±0.0105   | 0.7598±0.0469   |
| <b>allitridin</b>                                         | 0.0002±0.0001    | nd               | 0.4448±0.0002*** | 0.0039±0.0005   | 0.0001±0.0001   | 0.0001±0.0001   |
| <b>diallyl disulfide</b>                                  | 0.0029±0.0004    | 2.2207±0.2014*** | 0.0036±0.0001*   | 0.0015±0.0002   | nd              | nd              |
| <b>diallyl sulfide</b>                                    | nd               | nd               | 0.0007±0.0001    | 0.0005±0.0001   | nd              | nd              |
| <b>methyl allyl disulfide</b>                             | nd               | nd               | 0.0002±0.0001    | 0.0001±0.0001   | 0.0001±0.0001   | nd              |
| <b>s-allyl-L-cysteine (SAC) (S-1-Propenyl-L-cysteine)</b> | 0.5209±0.0295*   | 0.3271±0.0171    | 0.2822±0.0153*** | 0.0022±0.0004   | nd              | nd              |
| <b>s-methyl-L-cysteine (SMC)</b>                          | 0.0122±0.0013*   | 0.0069±0.0003    | 0.0508±0.0027*** | 0.0004±0.0001   | nd              | nd              |
| <b>s-methyl mercapto-L-cysteine</b>                       | 0.0001±0.0001    | 0.0006±0.0001**  | 0.0006±0.0001    | 0.0005±0.0001   | 0.0003±0.0001   | 0.0008±0.0001** |
| <b>s-methyl-L-cysteine sulfoxide</b>                      | 0.0341±0.0036    | 0.0582±0.0054*   | 0.0527±0.0094    | 0.0679±0.0033   | 0.0139±0.0016   | 0.0188±0.0009*  |
| <b>TOTAL</b>                                              | 7.1500±0.1211    | 10.8235±0.0768** | 10.7637±0.4622   | 9.8937±0.4106   | 1.2823±0.0149** | 0.7891±0.08102  |

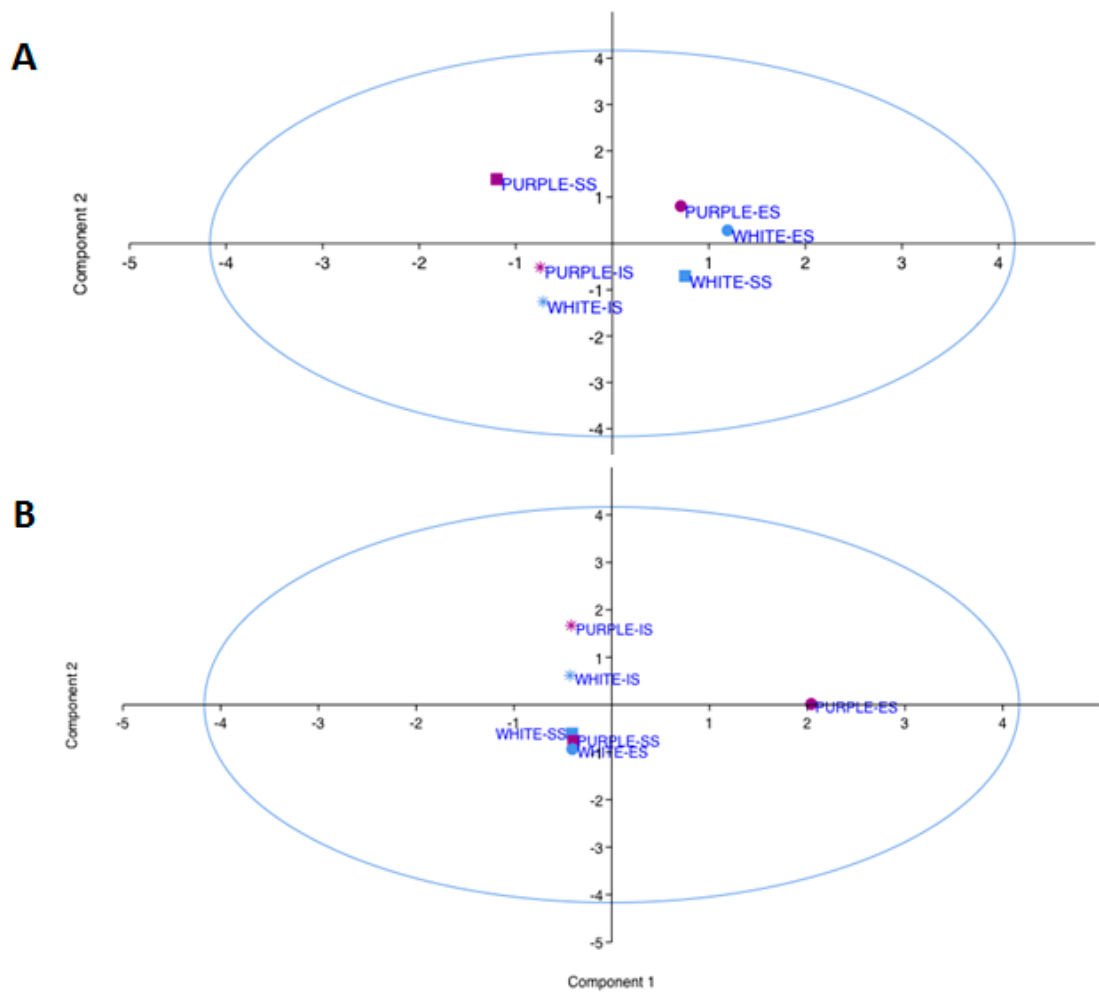

**Figure S2.** Principal component analysis (PCA), according the tissues/ecotypes, of sulfur compounds (A) and saponins (B) detected in three tissues (SS, ES and IS) of the white and purple ecotypes of garlic. Data represent, for each metabolite, the fold over the internal standard (IS) intensity.

**Table S2.** LC-HRMS analyses of saponin compounds in three tissues (SS, ES and IS) of white and purple garlic ecotypes. Data are expressed as AVG+ST.DEV. AVGs, which represent, for each metabolite, the fold over the internal standard (IS) have been obtained by using, at least, 3 independent biological replicates. Asterisks indicate significance of the fold change in an ANOVA plus Tukey's t-test (\*:  $p \leq 0.05$ ; \*\*:  $p \leq 0.01$ ; \*\*\*:  $p \leq 0.001$ ).

|                                         | WHITE-SS      | PURPLE-SS        | WHITE-ES      | PURPLE-ES         | WHITE-IS         | PURPLE-IS      |
|-----------------------------------------|---------------|------------------|---------------|-------------------|------------------|----------------|
| <b>agapanthagenin</b>                   | nd            | 0.0010±0.0003    | 0.0009±0.0002 | 0.2928±0.0209***  | nd               | nd             |
| <b>b-chlorogenin</b>                    | 0.0536±0.0123 | 0.0841±0.0092*   | 0.0654±0.0153 | 5.0366±0.5253***  | 0.0011±0.0003    | 0.0010±0.0002  |
| <b>desgalactotigonin</b>                | 0.0005±0.0001 | 0.0025±0.0006**  | 0.0011±0.0002 | 0.1043±0.0112***  | nd               | 0.0009±0.0002  |
| <b>desgalactotigonin-rhamnose</b>       | nd            | nd               | nd            | 0.0018±0.0001     | nd               | nd             |
| <b>diosgenin</b>                        | 0.0086±0.0020 | 0.0111±0.0009    | 0.0088±0.0019 | 0.8386±0.0506***  | nd               | nd             |
| <b>eruboside B</b>                      | 0.0461±0.0062 | 0.0349±0.0058    | 0.0140±0.0040 | 0.8999±0.1672***  | 0.0002±0.0001    | nd             |
| <b>eruboside B-rhamnose</b>             | 0.0076±0.0010 | 0.0654±0.0071*** | 0.0171±0.0026 | 0.6389±0.1680***  | 0.0002±0.0001    | nd             |
| <b>gitogenin</b>                        | 0.0536±0.0123 | 0.0806±0.0088    | 0.0652±0.0153 | 5.0270±0.5245***  | 0.0011±0.0003    | 0.0010±0.0002  |
| <b>proto-desgalactotigonin</b>          | nd            | nd               | nd            | 0.0004±0.0001     | nd               | nd             |
| <b>proto-desgalactotigonin-rhamnose</b> | nd            | 0.0003±0.0001    | nd            | nd                | nd               | nd             |
| <b>proto-eruboside B</b>                | 0.0004±0.0001 | 0.0024±0.0006*** | 0.0002±0.0001 | 0.0446±0.0107***  | 0.001±0.0001     | 0.0005±0.0002* |
| <b>sativoside B1-rhamnose</b>           | nd            | nd               | nd            | 0.0026±0.0002     | nd               | nd             |
| <b>sativoside R1</b>                    | nd            | nd               | nd            | 0.0014±0.0004     | nd               | nd             |
| <b>sativoside R2</b>                    | 0.0064±0.0002 | 0.0296±0.0031*** | 0.0134±0.0020 | 0.8516±0.2098***  | 0.0001±0.0001    | 0.0001±0.0001  |
| <b>sativoside R2-rhamnose</b>           | 0.0001±0.0001 | 0.0063±0.0003*** | 0.0003±0.0001 | 0.0274±0.0076***  | nd               | nd             |
| <b>voghieroside D1</b>                  | 0.0001±0.0001 | 0.0003±0.0001**  | nd            | 0.0046±0.0007     | nd               | nd             |
| <b>voghieroside E1</b>                  | nd            | 0.0005±0.0001    | 0.0001±0.0001 | 0.0074±0.0021***  | 0.0016±0.0001*** | 0.0003±0.0001  |
| <b>TOTAL</b>                            | 0.1768±0.0342 | 0.3192±0.0368*** | 0.1865±0.0416 | 13.7800±1.6995*** | 0.0054±0.0007    | 0.0038±0.0008  |

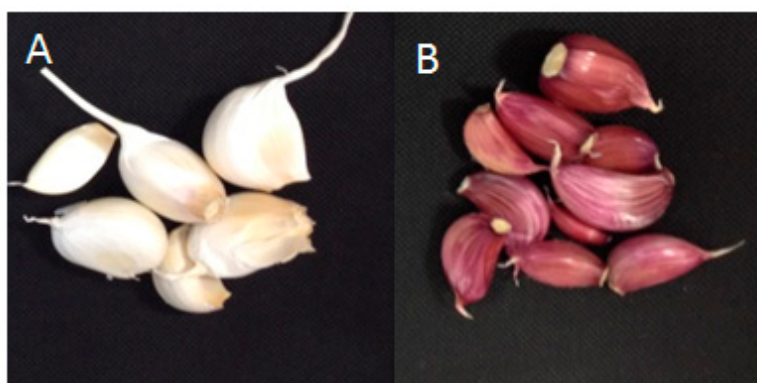

**Figure S3.** White (A) and purple (B) garlic ecotypes under study.
